# Supplementary material for: Activation and pro-inflammatory cytokine production by unswitched memory B cells during SARS-CoV-2 infection
Source: PubMed Central journal article supplement (PMC10449608; doi:10.3389/fimmu.2023.1213344), 2023-08-10
Supplement: Presentation_1.pdf [file Presentation_1.pdf]

## Supplemental Material for

### Activation and Pro-inflammatory Cytokine Production by Unswitched Memory B cells during SARS-CoV-2 infection

Moriah J. Castleman,<sup>1\*</sup> Adriana Luna Santos,<sup>1</sup> Kelsey E. Lesteberg,<sup>1,2</sup> James P. Maloney,<sup>3</sup>  
William J. Janssen,<sup>4,5</sup> Kara J. Mould,<sup>4,5</sup> J. David Beckham,<sup>1,2,6</sup> Roberta Pelanda,<sup>1</sup> and Raul M.  
Torres<sup>1\*</sup>

<sup>1</sup>Department of Immunology and Microbiology, University of Colorado School of Medicine,  
Aurora, Colorado, USA.

<sup>2</sup>Department of Medicine, Division of Infectious Disease, University of Colorado School of  
Medicine, Aurora, Colorado, USA.

<sup>3</sup>Department of Medicine, Division of Pulmonary Sciences and Critical Care Medicine,  
University of Colorado School of Medicine, Aurora, Colorado, USA.

<sup>4</sup>Department of Medicine, National Jewish Health, Denver, Colorado, USA.

<sup>5</sup>Department of Medicine, University of Colorado, Aurora, Colorado, USA.

<sup>6</sup>Rocky Mountain Regional VA, Medical Center, Aurora, Colorado, USA.

\*Corresponding authors: Moriah J. Castleman, Moriah.Castleman@cuanschutz.edu and Raul  
Torres, Raul.Torres@cuanschutz.edu

| <b>Cohort characteristics</b>                     |                    |                |                  |                            |               |
|---------------------------------------------------|--------------------|----------------|------------------|----------------------------|---------------|
| <b>Parameter</b>                                  | <b>Measurement</b> | <b>Healthy</b> | <b>Immunized</b> | <b>Convalescent (Mild)</b> | <b>Severe</b> |
| Age (years)                                       | Average (range)    | 42.6 (24-70)   | 54.1 (23-82)     | 40.2 (23-75)               | 64 (40-91)    |
| Sex                                               | % F (Sample size)  | 50 (10)        | 53.3 (15)        | 50 (12)                    | 53.3 (15)     |
| <b>Time (days) of blood collection post event</b> |                    |                |                  |                            |               |
| Primary vaccination                               | Average (range)    |                | 128 (10-535)     |                            |               |
| Booster                                           | Average (range)    |                | 114 (7-507)      |                            |               |
| 2nd booster                                       | Average (range)    |                | 155 (126-193)    |                            |               |
| Positive PCR test                                 | Average (range)    |                |                  | 83 (28-305)                |               |
| Admittance to hospital                            | Average (range)    |                |                  |                            | 11.2 (2-35)   |

**Supplemental Table 1. Demographics of individuals examined in this study.** Four cohorts of individuals were examined in this study including; healthy controls, those immunized against SARS-CoV-2 with mRNA platform vaccine, those with mild SARS-CoV-2 infection not requiring hospitalization in the convalescent stage, and those with severe SARS-CoV-2 infection requiring hospitalization.

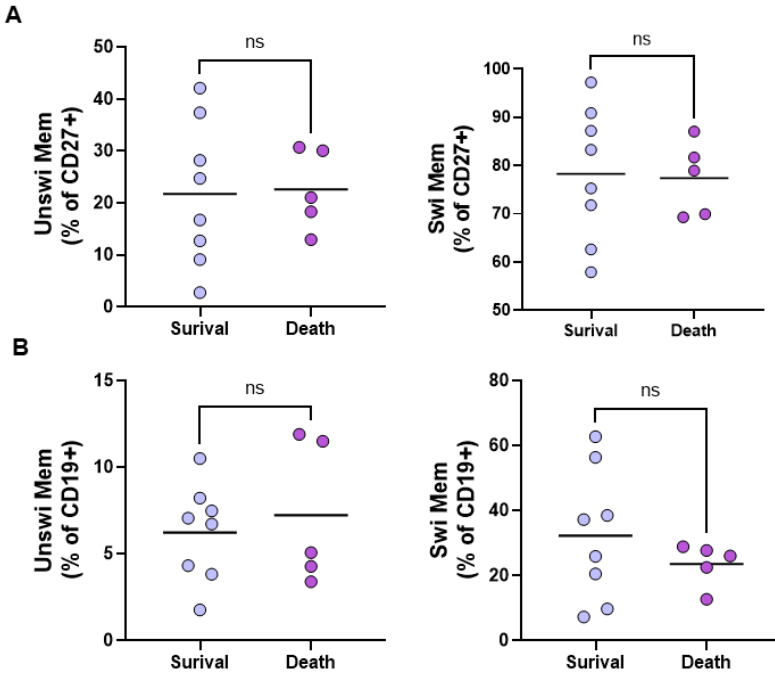

**Supplemental Figure 1. Frequency of memory populations do not predict clinical outcome.**

(A) Frequency of unswitched or switched memory B cells as a percentage of memory (CD27+) or (B) as a percentage of total B cells (CD19+) graphed based on survival or death during hospitalization with severe SARS-CoV-2 infection (N=13). Statistics: unpaired t test, ns not significant

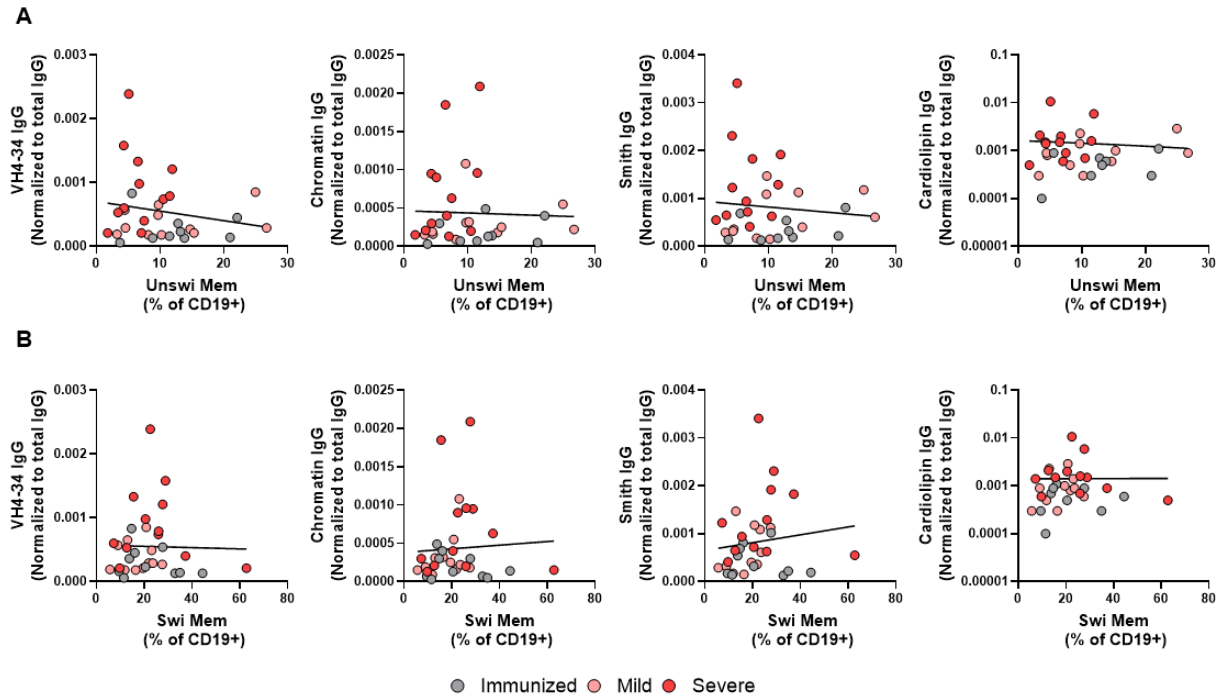

**Supplemental Figure 2. Frequency of unswitched or switched memory B cells do not correlate with levels of autoreactive IgG antibodies.** (A) Correlation of the frequency of unswitched memory or (B) switched memory B cells with plasma levels of autoreactive IgG antibodies (anti-VH4-34, anti-Chromatin, anti-Smith or anti-Cardiolipin) normalized to total IgG. Statistics: Pearson correlation.

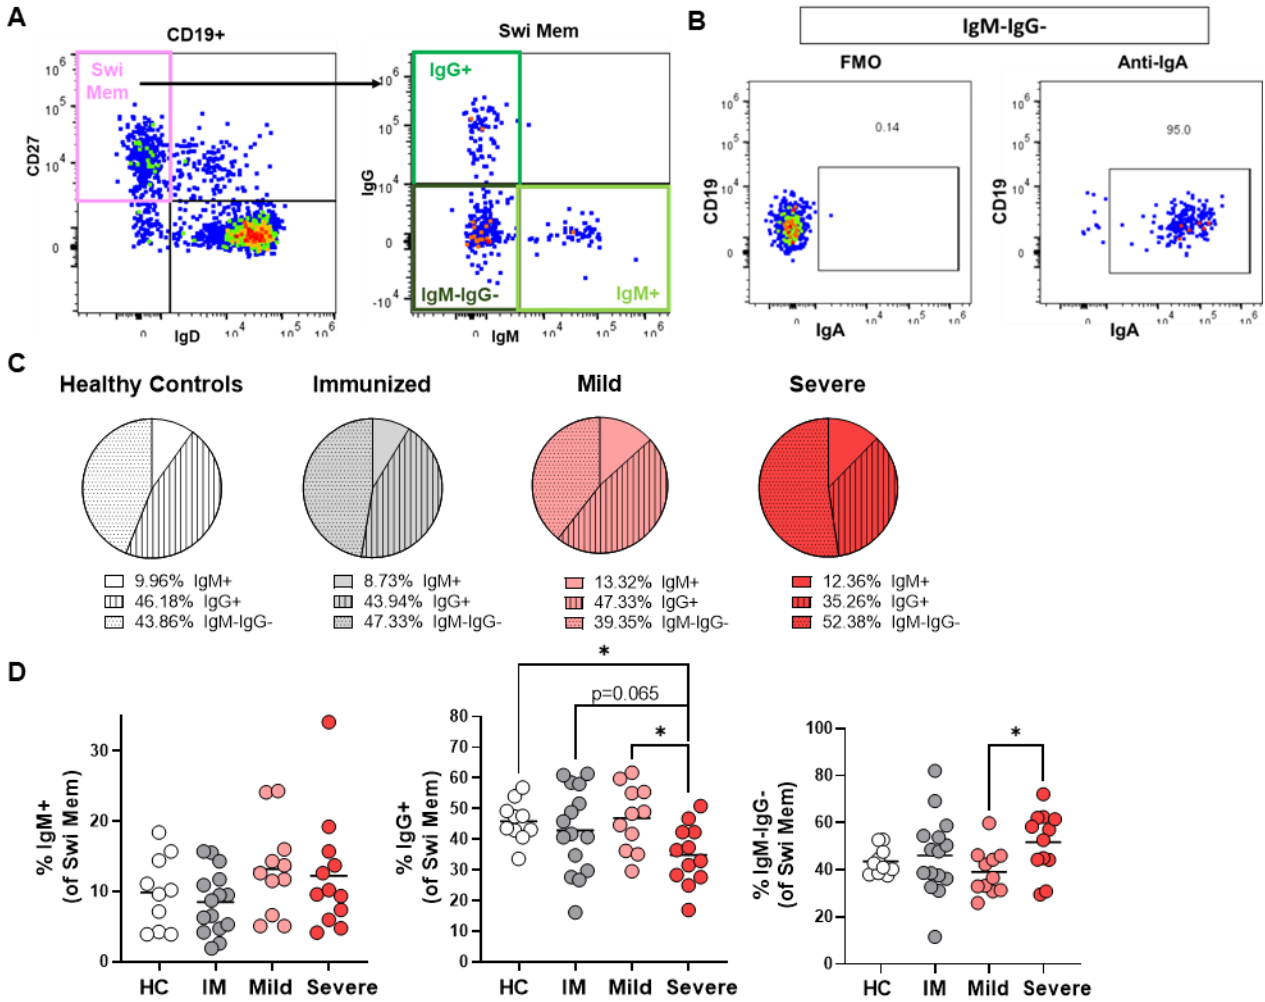

**Supplemental Figure 3. Alteration in isotype class of Switched Memory B cells with Severe SARS-CoV-2 infection.** (A) Representative flow plot from severe SARS-CoV-2 infection depicting IgM vs IgG gating in switched memory B cells. (B) Representative flow plot from healthy control gated on IgM-IgG<sup>-</sup> in switched memory B cells showing the majority of this population is IgA<sup>+</sup> compared to FMO. (C) Comparison of the average frequency of IgM<sup>+</sup>, IgG<sup>+</sup> or IgM-IgG<sup>-</sup> cells out of the switched memory compartment (CD27<sup>+</sup>IgD<sup>-</sup>) within each cohort. Sample size: Healthy controls (HC; N=10), Immunized controls (IM; N=15), subjects with Mild (N=11) or Severe SARS-CoV-2 infection (N=14). (D) Frequency of IgM<sup>+</sup>, IgG<sup>+</sup> or IgM-IgG<sup>-</sup> cells within the switched memory population (CD27<sup>+</sup> IgD<sup>-</sup>). Statistics: One-way ANOVA, \*p<0.05.

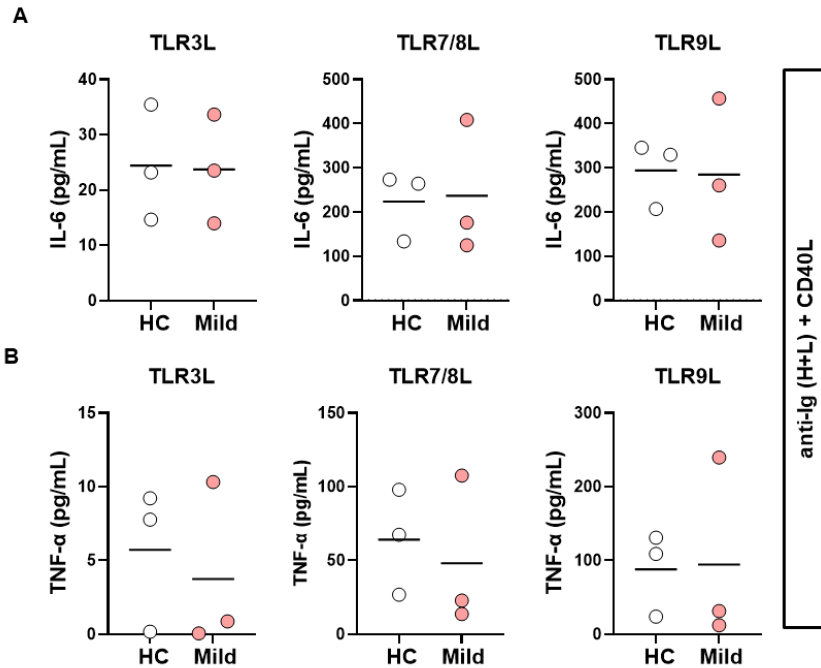

**Supplemental Figure 4. No difference in levels of IL-6 and TNF $\alpha$  secretion between B cells from healthy controls or mild SARS-CoV-2 infection.** (A) B cells were purified from healthy controls (HC, N=3) or subjects with mild SARS-CoV-2 infection (N=3) then stimulated in vitro overnight with 10ug/mL anti-Ig (H+L) F(ab) $'$ 2 + 100ng/mL CD40L with either 1ug/mL TL3RL (Poly I:C), 1ug/mL TLR7/8L (R848), or 2.5ug/mL TLR9L (CpG) and secretion of IL-6 or (B) TNF $\alpha$  was measured in cell culture supernatant. Statistics: unpaired t test.

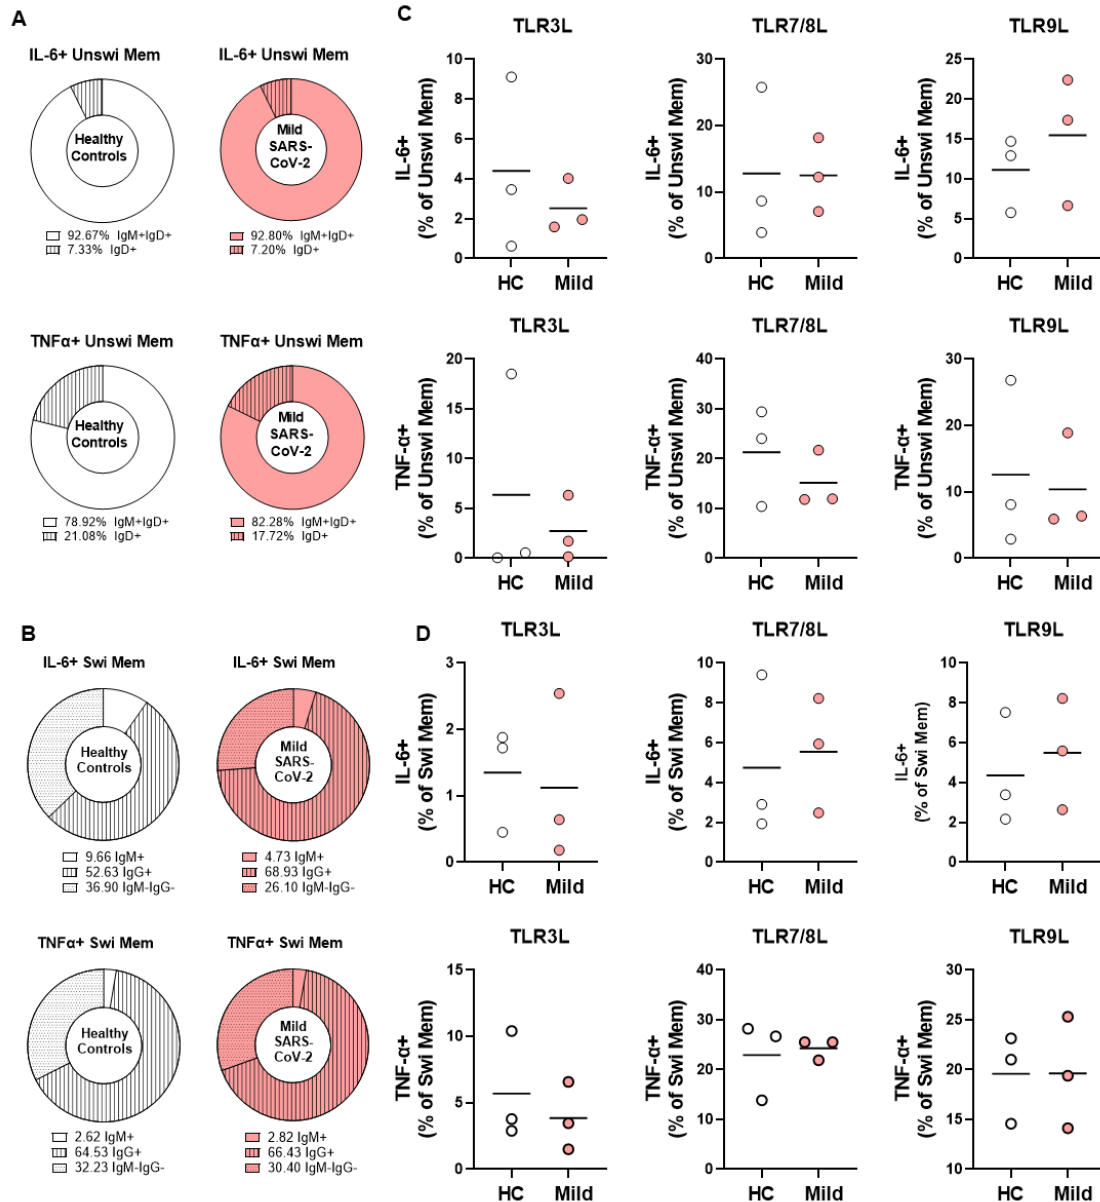

**Supplemental Figure 5. Frequency of memory isotype classes and no difference in the frequency of IL-6+ and TNFα+ between memory B cells from healthy controls or mild SARS-CoV-2 infection in response to viral TLR ligands.** (A) Average frequency of IgM+IgD+ or IgD-only populations within the IL-6-producing or TNFα-producing unswitched memory B cells or (B) average frequency of IgM+, IgG+, or IgM-IgG- populations within the IL-6-producing or TNFα-producing switched memory B cells after PBMCs from healthy controls (N=3) or subjects with mild SARS-CoV-2 infection (N=3) were stimulated with 50ng/mL PMA+ 1ug/mL Ionomycin or unstimulated control (-) for 4 hours in vitro. (C) PBMCs were stimulated 4hr in vitro with 10ug/mL anti-Ig (H+L) F(ab)'2 + 100ng/mL CD40L with either 1ug/mL TL3RL (Poly I:C), 1ug/mL TLR7/8L (R848), or 2.5ug/mL TLR9L (CpG) and frequency of IL-6+ or TNFα+ unswitched or (D) switched memory B cells from healthy controls (HC, N=3) or subjects with mild SARS-CoV-2 infection (N=3) were enumerated. Statistics: unpaired t test.
